# Supplementary material
Source: Springer Nature journal article supplement (https://www.springermedizin.de/resource/supplementary/12245_2010_92_MOESM4_ESM.pdf/9672748)

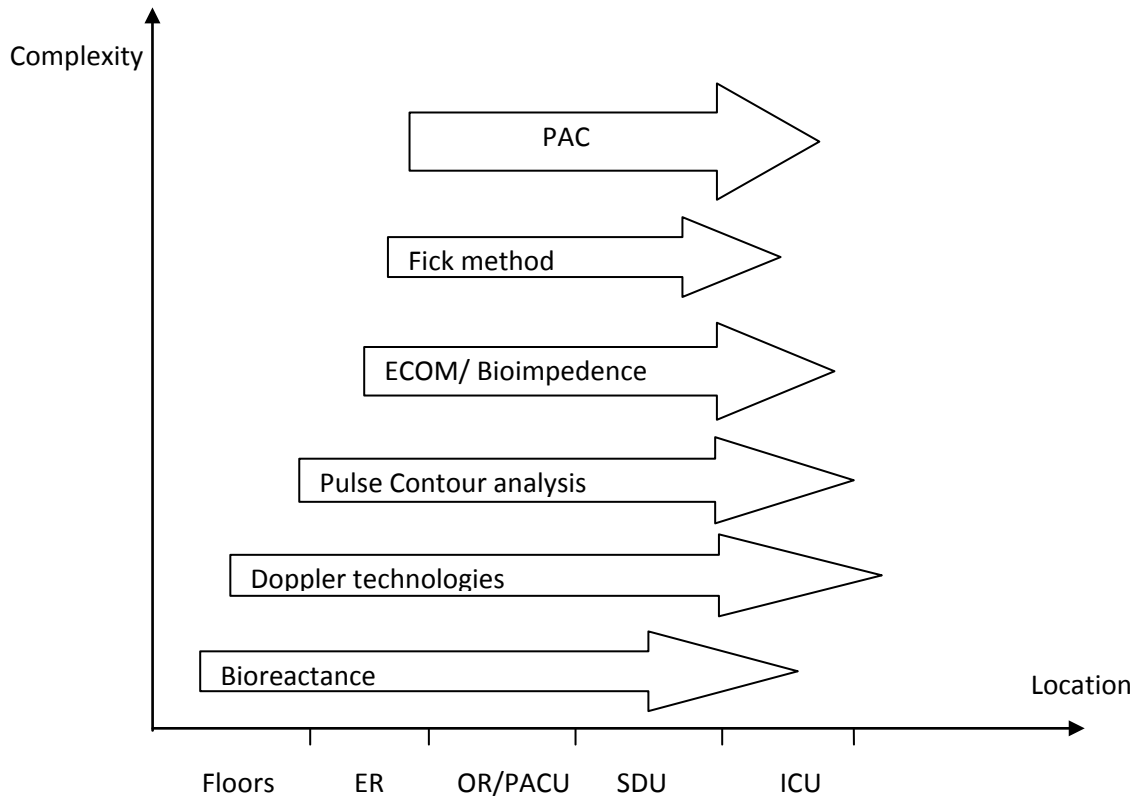

Supplement: MOESM4 [file 9672748]
